# Supplementary material
Source: PubMed Central journal article supplement (PMC7287332)
Supplement: rsta20190557supp1.pdf [file rsta20190557supp1.pdf]

## SUPPLEMENTAL MATERIALS

### Afterdepolarizations and abnormal calcium handling in atrial myocytes with modulated SERCA uptake: A sensitivity analysis of calcium handling channels

Andy C.Y. Lo<sup>1</sup>, Jieyun Bai<sup>1,2</sup>, Patrick A. Gladding<sup>3</sup>, Vadim V. Fedorov<sup>4</sup>,  
Jichao Zhao<sup>1</sup>

<sup>1</sup>*Auckland Bioengineering Institute, The University of Auckland, Auckland*

<sup>2</sup>*Department of Electronic Engineering, College of Information Science and Technology, Jinan University, Guangzhou, China*

<sup>3</sup>*Department of Cardiology, Waitemata District Health Board, Auckland, New Zealand*

<sup>4</sup>*Department of Physiology & Cell Biology and Bob and Corrine Frick Center for Heart Failure and Arrhythmia, The Ohio State University Wexner Medical Center, Columbus, OH, USA*

**Keywords:** SERCA uptake, delayed afterdepolarizations, altered calcium handling, bifurcation analysis, TBX5, atrial fibrillation

---

#### Supplemental Methods

To investigate if a bidirectional SERCA pump is a necessary component in capturing the phenoma where a reduction in SERCA activity initiates SDs, and a normalization or elevation instead suppresses them, we replaced the bidirectional SERCA pump in the full Maleckar et al. model with a unidirectional formulation taken from the Courtemanche-Ramirez-Nattel (CRN) model. Because the SERCA pump is now unidirectional, a generic leak from the CRN model was also introduced to the uptake compartment to ensure the model reaches steady state during diastole (53). We termed this hybrid model the 'Maleckar-CRN model' (Supplemental Materials Figure S6).

Using the Maleckar-CRN model, we conducted the same bifurcation analysis with SERCA-RyR, SERCA- $I_{CaL}$ , and SERCA- $I_{NaCa}$ , then compared the newly obtained SD threshold lines with that of the full Maleckar et al. model. For the unidirectional SERCA in all three bifurcations, from 80% SERCA to 40% SERCA, the minimum multiplier to trigger SDs for RyR and  $I_{CaL}$  was significantly higher and increased more steeply than in the bidirectional case. In comparison, the minimum multiplier for  $I_{NaCa}$  was significantly lower and decreased more sharply than in the bidirectional case in that parameter region. From 100% SERCA to 200%, the minimum multiplier was significantly lower and increased less steeply for RyR and  $I_{CaL}$ , while the minimum multiplier for  $I_{NaCa}$  was significantly higher and decreased less steeply than in the bidirectional case in that parameter region (Supplemental Materials Figure S7).

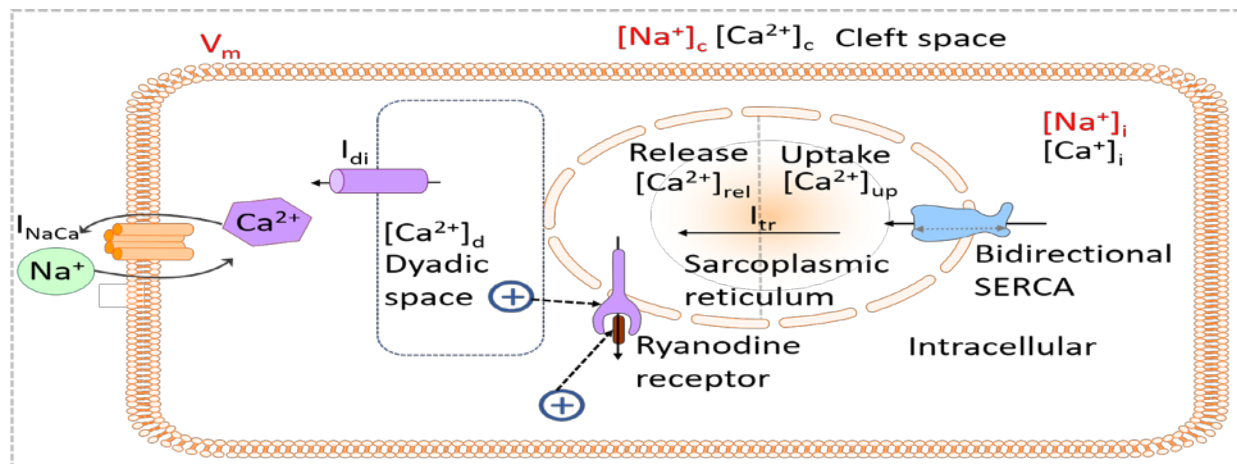

**Figure S1.** Schematic of the reduced Maleckar et al. model.  $V_m$ ,  $[Na^+]_i$ , and  $[Na^+]_c$  are set constant to their end-diastolic values after 3000 s pacing in the full Maleckar et al. model. A scalar multiplier is applied only to  $[Na^+]_i$  to cause an elevation in total  $Ca^{2+}$  concentration and potentially trigger SDs.

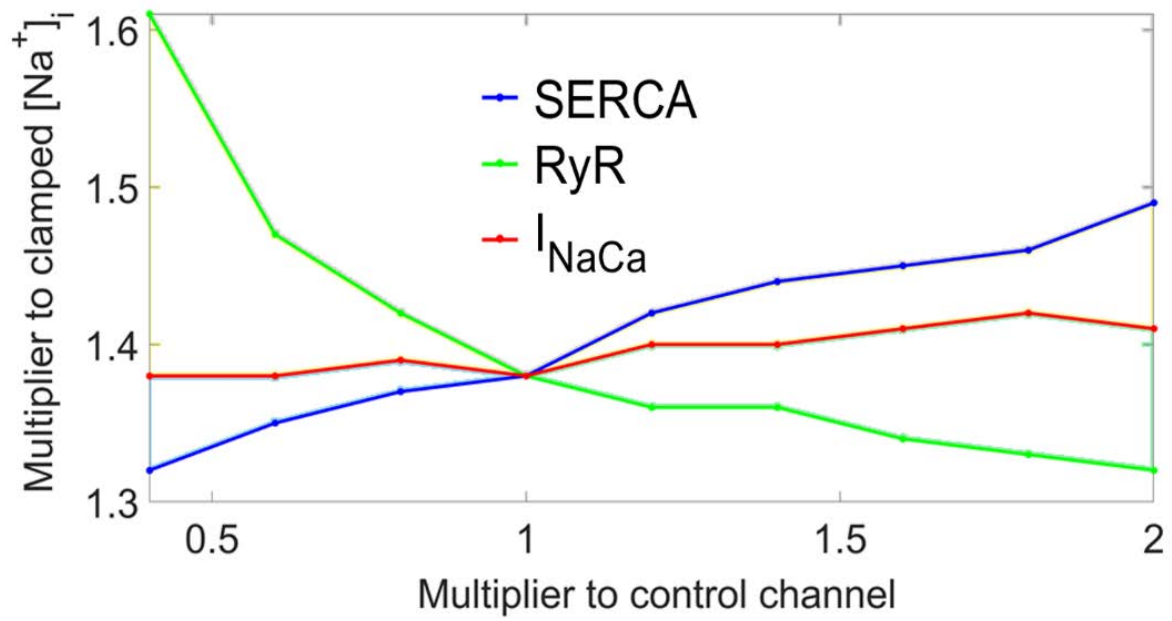

**Figure S2.** A calcium subsystem analysis of the reduced variant of the Maleckar et al. model illustrating how the minimum multiplier required for clamped  $[Na^+]_i$  to generate calcium oscillations changes due to changes in SERCA, RyR, or  $I_{NaCa}$ .

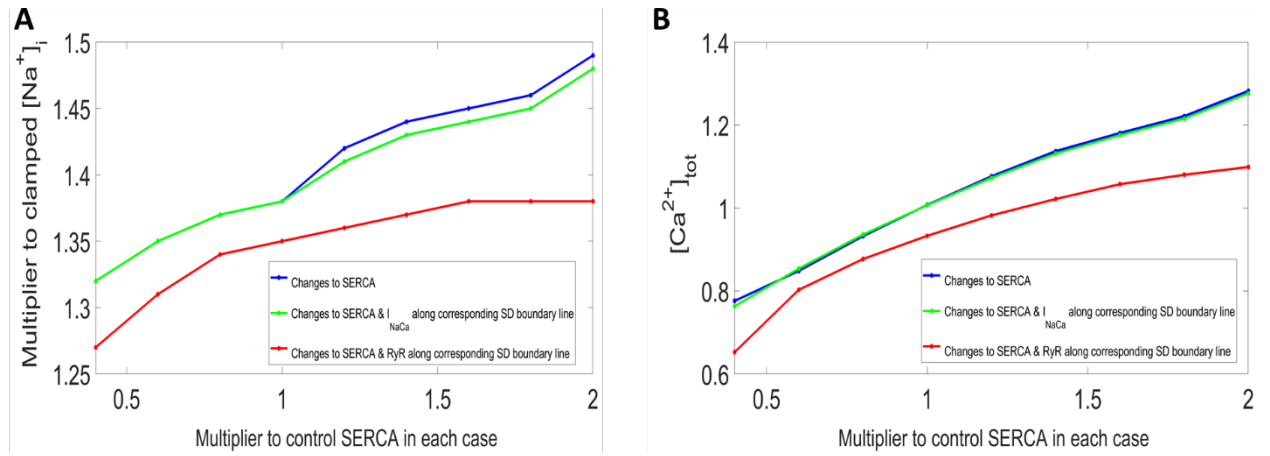

**Figure S3:** Comparing the multiplier to clamped  $[Na^+]_i$  **A**) and corresponding minimum  $[Ca^{2+}]_{tot}$  in the myocyte **B**) for  $Ca^{2+}$  oscillations in the reduced model due to changes in SERCA alone (blue line), and from changes in SERCA and  $I_{NaCa}$  (green line), and changes in SERCA and RyR (red line) based on those along the SD boundary in their respective bifurcations. SERCA, sarcoplasmic reticulum  $Ca^{2+}$ -ATPase; RyR, type 2 ryanodine receptor; SD, spontaneous depolarization.

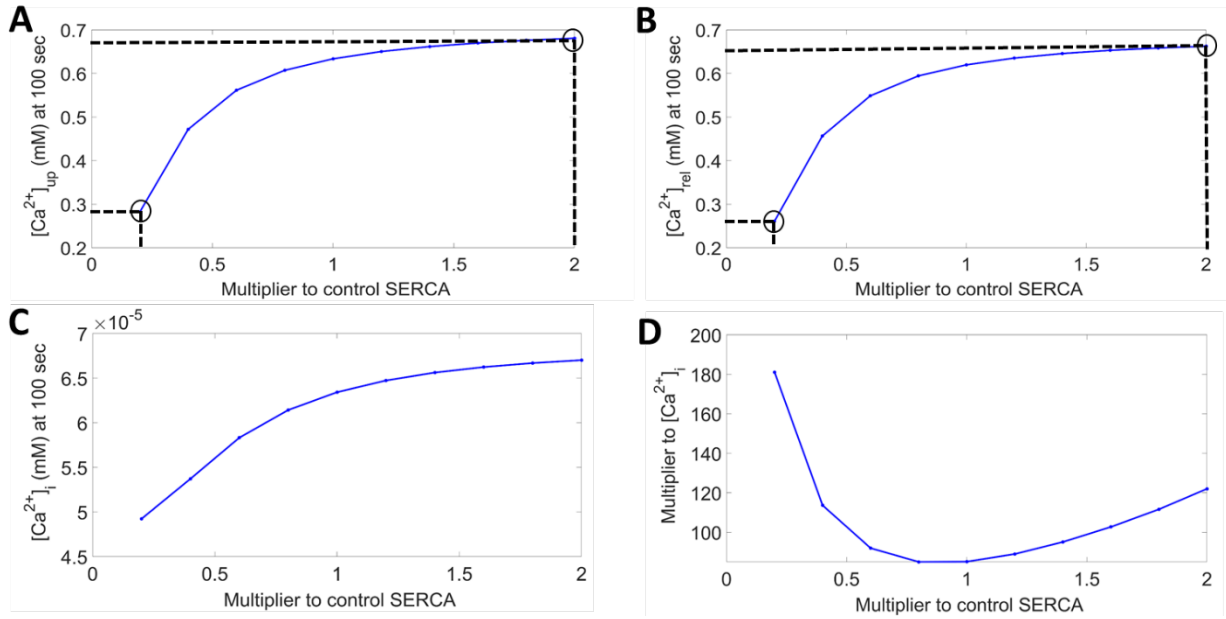

**Figure S4: A-C:** Values of  $[Ca^{2+}]_{up}$ ,  $[Ca^{2+}]_{rel}$ , and  $[Ca^{2+}]_i$  obtained at 100 s for various levels of SERCA under intracellular  $Ca^{2+}$  injection protocol 1. The indicated points for A and B show the values for  $[Ca^{2+}]_{up}$  and  $[Ca^{2+}]_{rel}$  from 200% and 20% SERCA which were used for intracellular  $Ca^{2+}$  injection protocol 2 to test how increasing or decreasing  $[Ca^{2+}]_{up}$  and  $[Ca^{2+}]_{rel}$  affects the  $[Ca^{2+}]_i$  SD threshold for various levels of SERCA. **D:** The minimum multiplier applied to  $[Ca^{2+}]_i$  to reach the  $[Ca^{2+}]_i$  SD threshold for various levels of SERCA.

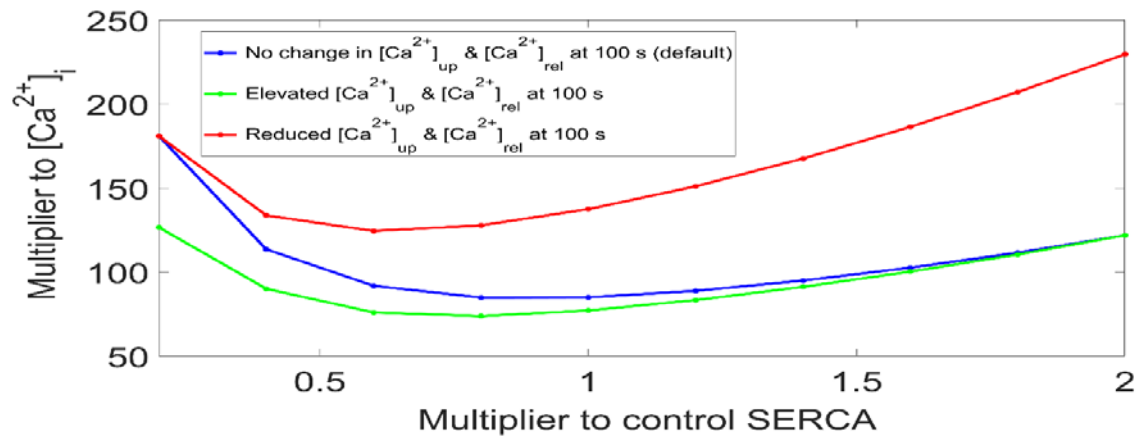

**Figure S5:** The minimum multiplier needed to raise  $[Ca^{2+}]_i$  to the  $[Ca^{2+}]_i$  SD threshold for various levels of SERCA for three different cases. The default case is when no change was made to  $[Ca^{2+}]_{up}$  and  $[Ca^{2+}]_{rel}$  at 100 s into the simulation, prior to intracellular  $Ca^{2+}$  injection (blue). The other two cases are when at 100 s into the simulation, prior to intracellular  $Ca^{2+}$  injection,  $[Ca^{2+}]_{up}$  and  $[Ca^{2+}]_{rel}$  were elevated and reduced to their values at 200% SERCA (green) and 20% SERCA (red) at 100 s respectively (see Figure S4A and B).

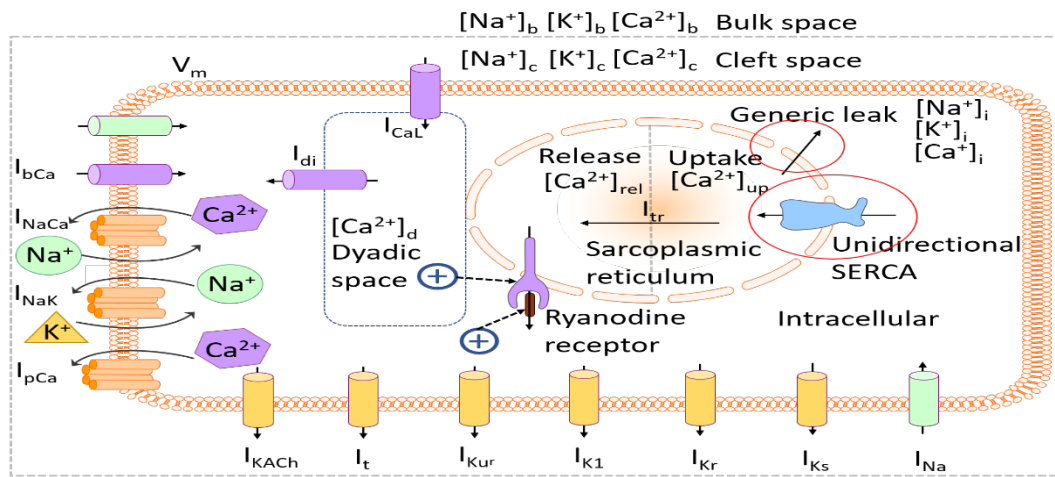

**Figure S6:** Schematic of the Maleckar-CRN model. Circled in red are the components taken from the CRN model.

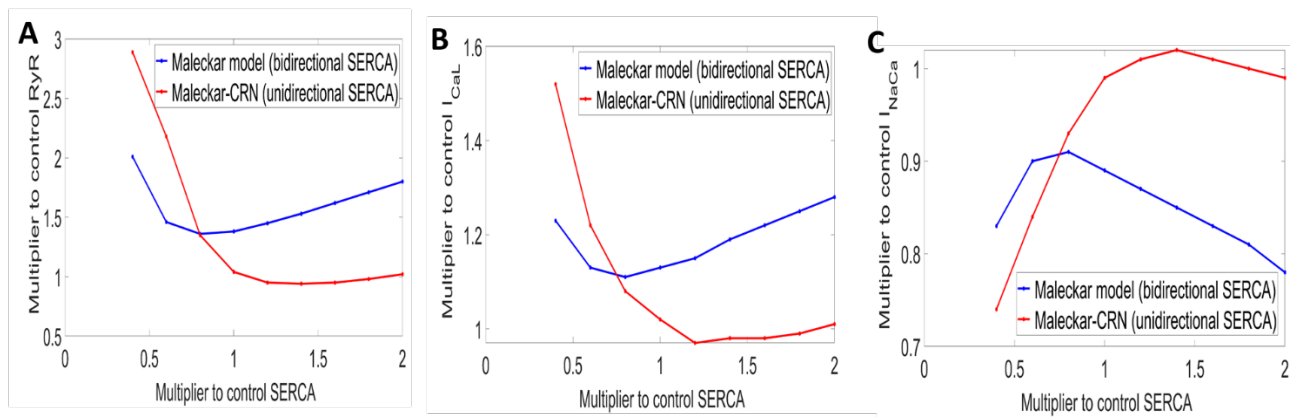

**Figure S7:** Bifurcation diagrams of **A)** SERCA-RyR **B)** SERCA-I<sub>CaL</sub> and **C)** SERCA-I<sub>NaCa</sub> from the full Maleckar et al. model (blue) and the Maleckar-CRN model (red).

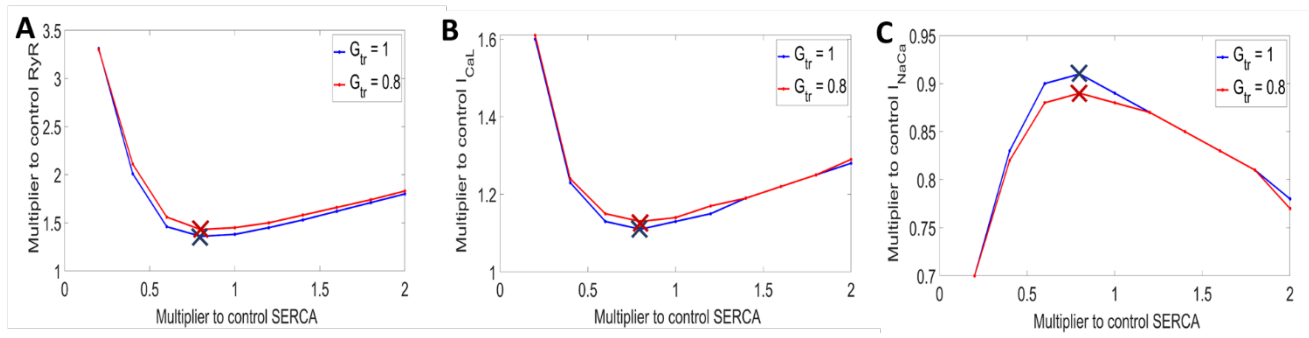

**Figure S8:** Bifurcation analysis of **A)** SERCA-RyR **B)** SERCA- $I_{CaL}$ , and **C)** SERCA- $I_{NaCa}$  under normal  $I_{tr}$  transfer (blue) and 80% of control  $I_{tr}$  transfer (red).

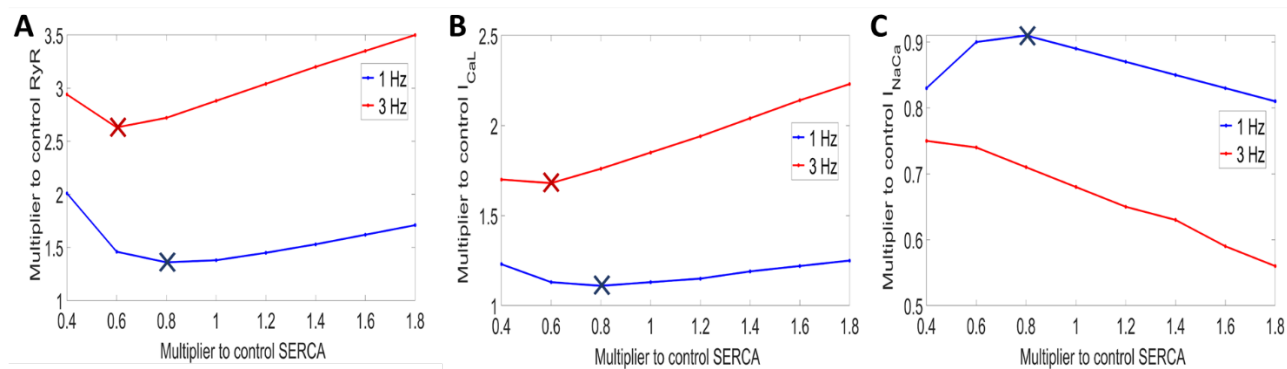

**Figure S9.** Bifurcation analysis of **A)** SERCA-RyR **B)** SERCA- $I_{CaL}$ , and **C)** SERCA- $I_{NaCa}$  under a 1 Hz (blue) and 3 Hz pacing (red) pacing protocol.
